# Supplementary material
Source: publisher figshare collection journal article supplement (https://tandf.figshare.com/ndownloader/files/21492531)
Supplement: Supplementary file 1 [file 21492531]

## Appendix

This section includes the proofs of the results presented in the preceding sections.

**Proof of Proposition 1.**  $v_1^e$  and  $v_2^e$  are functions of  $(v_1, v_2)$  that are uniquely determined by

$$\begin{cases} p_1 = (\alpha - 1)v_1 + v_2 - W_1(\mu_1, \lambda_1(v_1)) \\ p_2 = v_2 - W_2(\mu_2, \lambda_2(v_1, v_2)) \end{cases}, \quad (8)$$

of which  $\lambda_1(v_1) = \Lambda(1 - v_1^+)^+$  and  $\lambda_2(v_1, v_2) = \Lambda(\min\{1, v_1\} - v_2^+)^+$  with  $x^+ = \max\{0, x\}$ . It can be easily checked that  $v_1$  is the valuation threshold at which customers is indifferent between services 1 and 2, and  $v_2$  is the valuation threshold at which customer is indifferent between purchasing service 2 and not purchasing any service. Due to the various relationships between 0, 1,  $v_1$  and  $v_2$ , there are four cases. Note that  $v_1^e$  and  $v_2^e$  are thresholds that determine the firms' effective arrival rate. Literally speaking,  $(v_1^e, v_2^e)$  does not necessarily equal  $(v_1, v_2)$ : a customer who prefers service 1 over service 2 does not necessarily purchase service 1 eventually, because she may prefer balking over purchasing service 1. As a result, these equilibrium arrival rates comprise four different value-based market segmentations as shown in the following.

The specified functional relation between  $(v_1^e, v_2^e)$  and  $(v_1, v_2)$  takes the following forms.

- 1) If  $0 \leq v_2 \leq v_1 \leq 1$ , then  $v_1^e = v_1$  and  $v_2^e = v_2$ .
- 2) If  $0 \leq v_1 \leq v_2 \leq 1$ , then  $v_2^e = v_1^e$  and  $v_1^e$  is given by

$$\alpha v_1^e - W_1(\mu_1, \lambda_1^e) = \alpha v_1 - W_1(\mu_1, \Lambda(1 - v_1)) + v_2 - v_1. \quad (9)$$

- 3) If  $v_1 < 0 \leq v_2 \leq 1$ , then  $v_2^e = v_1^e$  and  $v_1^e$  is given by

$$\alpha v_1^e - W_1(\mu_1, \lambda_1^e) = \alpha v_1 - W_1(\mu_1, \Lambda) + v_2 - v_1. \quad (10)$$

- 4) If  $0 \leq v_2 \leq 1 < v_1$ , then  $v_1^e = 1$  and  $v_2^e$  is given by

$$v_2^e - W_2(\mu_2, \lambda_2^e) = p_2. \quad (11)$$

The proof of this Proposition involves lengthy analysis. We put it as a permanent working paper Huang *et al.* (2017). For brevity, we omit it in this paper, and refer to interested readers to Huang *et al.* (2017) for details.  $\square$

**Proof of Lemma 1.** 1. Note that if firm 1 chooses any strategy greater than 1, then  $\lambda_1 = 0$ . Considering this, firm 1's optimal strategy must be no greater than 1, and this includes two cases,  $v_1 \geq v_2$  and  $v_1 \leq v_2$ .

1-1) Suppose that firm 1 chooses a strategy from  $v_1 \geq v_2$ . Then we have  $\lambda_1(v_1) = \Lambda(1 - v_1)$ , and firm 1's local best response (denoted by  $v_1^1(v_2)$ ) is

$$v_1^1(v_2) = \operatorname{argmax}_{v_2 \leq v_1 \leq 1} \pi_1(v_1),$$

where  $\pi_1(v_1) = \Lambda(1 - v_1)[(\alpha - 1)v_1 + v_2 - W_1(\mu_1, \lambda_1(v_1))]$ . Let  $\Lambda(1 - v_m) = \mu_1$ . It is clear that if  $v_1 \leq v_m$ , then  $W_1(\mu_1, \lambda_1(v_1)) = \infty$ , and so  $\pi_1(v_1) = -\infty$ . Thus, the optimal strategy must satisfy  $v_1 > v_m$ , in which  $\pi_1(v_1)$  is continuous in  $v_1$ . Given  $v_m < v_1 \leq 1$ , it can be easily calculated that

$$\begin{aligned} \pi_1'(v_1) &= \Lambda(1 - v_1) \left[ \alpha - 1 + \Lambda \frac{\partial W_1(\mu_1, \lambda_1(v_1))}{\partial \lambda_1} \right] - \Lambda[(\alpha - 1)v_1 + v_2 - W_1(\mu_1, \lambda_1(v_1))], \\ \pi_1''(v_1) &= -\Lambda^3(1 - v_1) \frac{\partial^2 W_1(\mu_1, \lambda_1(v_1))}{\partial \lambda_1^2} - 2\Lambda \left[ \alpha - 1 + \Lambda \frac{\partial W_1(\mu_1, \lambda_1(v_1))}{\partial \lambda_1} \right] < 0. \end{aligned}$$

Thus,  $\pi_1(v_1)$  is a strictly concave function with respect to  $v_1$  given  $v_m < v_1 \leq 1$ . Let  $v_1^0(v_2)$  be the stationary point of  $\pi_1(v_1)$  with respect to  $v_1$  given  $v_m < v_1 \leq 1$ , which is determined by the FOC  $\pi_1'(v_1^0(v_2)) = 0$ , i.e.,

$$\Lambda(1 - v_1^0(v_2)) \left[ \alpha - 1 + \Lambda \frac{\partial W_1(\mu_1, \lambda_1(v_1^0(v_2)))}{\partial \lambda_1} \right] - \Lambda[(\alpha - 1)v_1^0(v_2) + v_2 - W_1(\mu_1, \lambda_1(v_1^0(v_2)))] = 0. \quad (12)$$

Note that  $\pi_1''(v_1) < 0$  and  $\lim_{v_1 \rightarrow v_m} \pi_1'(v_1) = +\infty > 0$ . It follows that  $v_1^0(v_2)$  is well-defined only when  $\pi_1'(1) \leq 0$ ; i.e.  $v_2 \geq 1 - \alpha + W_1(\mu_1, 0)$ . Thus, given  $v_1 \in (v_m, 1]$ , if  $v_2 < 1 - \alpha + W_1(\mu_1, 0)$ , then  $\pi_1(v_1)$  is increasing in  $v_1$ ; if  $v_2 \geq 1 - \alpha + W_1(\mu_1, 0)$ , then  $\pi_1(v_1)$  peaks at  $v_1^0(v_2)$  and  $v_m < v_1^0(v_2) \leq 1$ . Incorporating the constraint  $v_2 \leq v_1$ ,  $v_1^1(v_2)$  is given by

$$v_1^1(v_2) = \begin{cases} 1, & v_2 < 1 - \alpha + W_1(\mu_1, 0) \\ \max\{v_1^0(v_2), v_2\}, & v_2 \geq 1 - \alpha + W_1(\mu_1, 0) \end{cases}. \quad (13)$$

In what follows, we show how to simplify  $v_1^1(v_2)$  with the condition that  $v_2 \geq 1 - \alpha + W_1(\mu_1, 0)$ . Differentiating (??) with respect to  $v_2$ , we have

$$\left[ \Lambda^2(1 - v_1^0(v_2)) \frac{\partial^2 W_1(\mu_1, \lambda_1(v_1^0(v_2)))}{\partial \lambda_1^2} + 2 \left( \alpha - 1 + \Lambda \frac{\partial W_1(\mu_1, \lambda_1(v_1^0(v_2)))}{\partial \lambda_1} \right) \right] \frac{\partial v_1^0(v_2)}{\partial v_2} = -1,$$

and so

$$\frac{\partial v_1^0(v_2)}{\partial v_2} < 0, \quad \frac{\partial v_1^0(v_2) - v_2}{\partial v_2} < 0.$$

Thus, there exists at most one solution with respect to  $v_2$  for  $v_1^0(v_2) = v_2$ . Note that when  $v_2 = 1 - \alpha + W_1(\mu_1, 0)$ ,  $v_1^0(v_2) = 1$  and  $v_1^0(v_2) - v_2 = \alpha - W_1(\mu_1, 0) > 0$ . Note also that when

$v_2 = 1$ , Eq. (??) becomes

$$\Lambda(1 - v_1^0(1)) \left[ \alpha - 1 + \Lambda \frac{\partial W_1(\mu_1, \lambda_1(v_1^0(1)))}{\partial \lambda_1} \right] - \Lambda[(\alpha - 1)v_1^0(1) + 1 - W_1(\mu_1, \lambda_1(v_1^0(1)))] = 0,$$

whose LHS is obviously decreasing in  $v_1^0(1)$ , and it is negative when  $v_1^0(1) = 1$ ; so  $v_1^0(1) < 1$ . Thus, when  $v_2 = 1$ ,  $v_1^0(v_2) < 1 = v_2$ . This means there exists a unique root with respect to  $v_2$  of  $v_1^0(v_2) = v_2$  between  $1 - \alpha + W_1(\mu_1, 0)$  and 1. Denote such a root as  $\underline{v}_2$ . By Eq. (??), it satisfies the following equation:

$$\Lambda(1 - \underline{v}_2) \left[ \alpha - 1 + \Lambda \frac{\partial W_1(\mu_1, \lambda_1(\underline{v}_2))}{\partial \lambda_1} \right] - \Lambda[\alpha \underline{v}_2 - W_1(\mu_1, \lambda_1(\underline{v}_2))] = 0. \quad (14)$$

By the monotonicity of  $v_1^0(v_2) - v_2$ , it is clear that  $v_1^0(v_2) > v_2$  for  $v_2 < \underline{v}_2$ . Then, we can specify  $v_1^1(v_2)$  (Eq. (7)) as

$$v_1^1(v_2) = \begin{cases} 1, & 0 \leq v_2 < 1 - \alpha + W_1(\mu_1, 0) \\ v_1^0(v_2), & 1 - \alpha + W_1(\mu_1, 0) \leq v_2 \leq \underline{v}_2 \\ v_2, & v_2 > \underline{v}_2 \end{cases} \quad (15)$$

1-2) Suppose that firm 1 chooses a strategy from  $v_1 \leq v_2$ . Then we have  $\lambda_1 = \Lambda(1 - v_1)$ , and firm 1's local best response (denoted by  $v_1^2(v_2)$ ) is

$$v_1^2(v_2) = \operatorname{argmax}_{0 \leq v_1 \leq v_2} \pi_1(v_1),$$

where  $\pi_1(v_1) = \Lambda(1 - v_1)[\alpha v_1 - W_1(\mu_1, \lambda_1(v_1))]$ . Given  $v_1 \leq 1$ , it can be easily calculated that

$$\begin{aligned} \pi_1'(v_1) &= \Lambda(1 - v_1) \left[ \alpha + \Lambda \frac{\partial W_1(\mu_1, \lambda_1(v_1))}{\partial \lambda_1} \right] - \Lambda[\alpha v_1 - W_1(\mu_1, \lambda_1(v_1))], \\ \pi_1''(v_1) &= -\Lambda^3(1 - v_1) \frac{\partial W_1(\mu_1, \lambda_1(v_1))}{\partial \lambda_1} - 2\Lambda \left[ \alpha + \Lambda \frac{\partial W_1(\mu_1, \lambda_1(v_1))}{\partial \lambda_1} \right] < 0. \end{aligned}$$

This means that  $\pi_1(\cdot)$  is strictly concave. Let  $v_1^M$  be the stationary point of  $\pi_1(\cdot)$ , which is determined with the following FOC:

$$\Lambda(1 - v_1^M) \left[ \alpha + \Lambda \frac{\partial W_1(\mu_1, \lambda_1(v_1^M))}{\partial \lambda_1} \right] - \Lambda[\alpha v_1^M - W_1(\mu_1, \lambda_1(v_1^M))] = 0. \quad (16)$$

Furthermore, as  $\pi_1''(v_1) < 0$ ,  $\pi_1'(0) > 0$  and  $\pi_1'(1) < 0$ , it is clear that  $v_1^M$  is well-defined,  $0 < v_1^M < 1$ , and

$$v_1^2(v_2) = \begin{cases} v_2, & 0 \leq v_2 < v_1^M \\ v_1^M, & v_2 \geq v_1^M \end{cases} \quad (17)$$

In the following, we compare the two local best responses and pick the one resulting in larger profit as the global best response. Before this, we first show that  $0 < \underline{v}_2 < v_1^M < 1$ . Denote

$$f_3(x) := (2\alpha - 1)(1 - x)\Lambda - \alpha\Lambda + \Lambda \left[ W_1(\mu_1, \lambda_1(x)) + \Lambda(1 - x) \frac{\partial W_1(\mu_1, \lambda_1(x))}{\partial \lambda_1} \right], \quad (18)$$

$$f_4(x) := 2\alpha(1 - x)\Lambda - \alpha\Lambda + \Lambda \left[ W_1(\mu_1, \lambda_1(x)) + \Lambda(1 - x) \frac{\partial W_1(\mu_1, \lambda_1(x))}{\partial \lambda_1} \right]. \quad (19)$$

It is easily seen that given  $x \in [0, 1]$ ,  $f_3(x)$  and  $f_4(x)$  are decreasing in  $x$ , and  $f_3(x) \leq f_4(x)$  (the equality holds only when  $x = 1$ ). And, by Eqs. (8) and (??), it is clear that

$$f_3(\underline{v}_2) = 0, \quad f_4(v_1^M) = 0.$$

Since

$$f_3(0) = (\alpha - 1)\Lambda + \Lambda \left[ W_1(\mu_1, \lambda_1(0)) + \Lambda \frac{\partial W_1(\mu_1, \lambda_1(0))}{\partial \lambda_1} \right] > 0,$$

$$f_4(1) = -\alpha + W_1(\mu_1, 0) < 0.$$

it follows that  $0 < \underline{v}_2, v_1^M < 1$  and  $f_3(v_1^M) < f_4(v_1^M) = 0$ . Thus,

$$0 < \underline{v}_2 < v_1^M < 1.$$

Then, we capture firm 1's global best response ( $v_1^*(v_2)$ ) based on the preceding results, the local best response  $v_1^1(v_2)$  and  $v_1^2(v_2)$  (see Eqs. (9) and (10)).

- a. When  $0 \leq v_2 < 1 - \alpha + W_1(\mu_1, 0)$ ,  $v_1^2(v_2) = v_2$  is a feasible strategy contained by  $v_1 \geq v_2$ . Note that  $v_1^1(v_2)$  is the local best response for all  $v_1 \geq v_2$ , so  $v_1^2(v_2)$  is dominated by  $v_1^1(v_2)$ , thus indicating that  $v_1^*(v_2) = v_1^1(v_2) = 1$ .
- b. When  $1 - \alpha + W_1(\mu_1, 0) \leq v_2 \leq \underline{v}_2$ , we have  $v_1^2(v_2) = v_2$ . Similar to Case a, it follows that  $v_1^*(v_2) = v_1^1(v_2) = v_1^0(v_2)$ .
- c. When  $\underline{v}_2 < v_2 < v_1^M$ ,  $v_1^1(v_2) = v_2 = v_1^2(v_2)$ , and so  $v_1^*(v_2) = v_2$ .
- d. When  $v_2 \geq v_1^M$ ,  $v_1^1(v_2) = v_2$  is a feasible strategy contained by  $v_1 \leq v_2$ . Note that  $v_1^2(v_2)$  is the local best response for all  $v_1 \leq v_2$ , so  $v_1^1(v_2)$  is dominated by  $v_1^2(v_2)$ , thus indicating that  $v_1^*(v_2) = v_1^2(v_2) = v_1^M$ .

2. Given  $v_1 \leq 1$ , firm 2's revenue (denoted by  $\pi_2(v_2)$ ) can be divided into two cases; that is

$$\pi_2(v_2) = \begin{cases} \Lambda(v_1 - v_2)[v_2 - W_2(\mu_2, \lambda_2(v_2))], & v_2 \leq v_1 \\ 0, & v_2 > v_1 \end{cases}.$$

Obviously, any strategy greater than  $v_1$  is dominated by those no greater than  $v_1$ . Thus, firm 2's best response is

$$v_2^*(v_1) = \operatorname{argmax}_{0 \leq v_2 \leq v_1} \pi_2(v_2) = \Lambda(v_1 - v_2)[v_2 - W_2(\mu_2, \lambda_2(v_2))].$$

Given  $0 \leq v_2 \leq v_1$ , it can be easily calculated that

$$\begin{aligned} \pi_2'(v_2) &= \Lambda(v_1 - v_2) \left[ 1 + \Lambda \frac{\partial W_2(\mu_2, \lambda_2(v_2))}{\partial \lambda_2} \right] - \Lambda[v_2 - W_2(\mu_2, \lambda(v_2))], \\ \pi_2''(v_2) &= -\Lambda^3(v_1 - v_2) \frac{\partial^2 W_2(\mu_2, \lambda_2(v_2))}{\partial \lambda_2^2} - 2\Lambda \left[ 1 + \Lambda \frac{\partial W_2(\mu_2, \lambda_2(v_2))}{\partial \lambda_2} \right] < 0. \end{aligned}$$

That is,  $\pi_2(\cdot)$  is a strictly concave function. Let  $v_2^0(v_1)$  be the stationary point of  $\pi_2(\cdot)$  with respect to  $v_2$  with the constraint that  $0 \leq v_2 \leq v_1$ , which is determined by

$$\Lambda(v_1 - v_2^0(v_1)) \left[ 1 + \Lambda \frac{\partial W_2(\mu_2, \lambda_2(v_2^0(v_1)))}{\partial \lambda_2} \right] - \Lambda[v_2^0(v_1) - W_2(\mu_2, \lambda(v_2^0(v_1)))] = 0. \quad (20)$$

Note that  $\pi_2''(v_2) < 0$  and  $\pi_2'(0) > 0$ .  $v_2^0(v_1)$  is well-defined only when  $\pi_2'(v_1) \geq 0$ ; i.e.,  $v_1 \geq W_2(\mu_2, 0)$ . Thus, given  $0 \leq v_2 \leq v_1$ , if  $v_1 < W_2(\mu_2, 0)$ , then  $\pi_2(v_2)$  is increasing in  $v_2$ ; if  $v_1 \geq W_2(\mu_2, 0)$ , then  $\pi_2(v_2)$  peaks at  $v_2 = v_2^0(v_1)$ . Thus,  $v_2^*(v_1)$  is given by

$$v_2^*(v_1) = \begin{cases} v_1, & 0 \leq v_1 < W_2(\mu_2, 0) \\ v_2^0(v_1), & W_2(\mu_2, 0) \leq v_1 \leq 1 \end{cases}. \quad (21)$$

In particular, if  $v_1 = W_2(\mu_2, 0)$ , then  $v_2^0(v_1) = W_2(\mu_2, 0)$ .

Furthermore, differentiating Eq. (??) with respect to  $v_1$ , we have

$$\begin{aligned} & \Lambda \left[ 2 + 2\Lambda \frac{\partial W_2(\mu_2, \lambda_2(v_2^0(v_1)))}{\partial \lambda_2} + \Lambda^2(v_1 - v_2^0(v_1)) \frac{\partial^2 W_2(\mu_2, \lambda_2(v_2^0(v_1)))}{\partial \lambda_2^2} \right] \frac{\partial v_2^0(v_1)}{\partial v_1} \\ &= \Lambda \left[ 1 + 2\Lambda \frac{\partial W_2(\mu_2, \lambda_2(v_2^0(v_1)))}{\partial \lambda_2} + \Lambda^2(v_1 - v_2^0(v_1)) \frac{\partial^2 W_2(\mu_2, \lambda_2(v_2^0(v_1)))}{\partial \lambda_2^2} \right], \end{aligned}$$

and so

$$0 < \frac{\partial v_2^0(v_1)}{\partial v_1} < 1.$$

This proves the monotonicity of  $v_2^0(v_1)$  with respect to  $v_1$ . □

**Proof of Proposition 2.** In particular,  $\mu_2^T(\mu_1)$  is the unique solution to  $W_2(\mu_2^T(\mu_1), 0) = 1 - \lambda_1^T/\Lambda$ . We first show that  $\mu_2 < \mu_2^T(\mu_1)$  is equivalent to  $W_2(\mu_2, 0) > v_1^M$ . By the definition of  $\mu_2^T(\mu_1)$ , it is easily seen that  $\mu_2 < \mu_2^T(\mu_1)$  indicates

$$4\alpha t - \alpha\Lambda + \Lambda \left[ W_1(\mu_1, 2t) + 2t \frac{\partial W_1(\mu_1, 2t)}{\partial \lambda_1} \right] < 0,$$

where  $t = \Lambda[1 - W_2(\mu_2, 0)]/2$ . By the definition of  $f_4(x)$  (see Eq. (??)) and  $v_1^M$ , this further indicates that  $f_4(W_2(\mu_2, 0)) < 0 = f_4(v_1^M)$ . Finally, by the monotonicity of  $f_4(\cdot)$ , it follows that  $W_2(\mu_2, 0) > v_1^M$ . According to Lemma 1, we have Figure 9.

Figure 9: The Nash equilibrium

As shown in Figure 9, there exists continuum equilibria, from  $(\underline{v}_2, \underline{v}_2)$  to  $(v_1^M, v_1^M)$ . Among these equilibria,  $\lambda_2^T = 0$  and so  $\pi_2 = 0$  holds. As for firm 1, given  $v_2 = v_1$ , it solves

$$\max_{\underline{v}_2 \leq v_1 \leq v_1^M} \pi_1(v_1) = \Lambda(1 - v_1)[\alpha v_1 - W_1(\mu_1, \lambda_1(v_1))].$$

By the definition of  $v_1^M$ , it is clear that  $\pi_1(v_1)$  peaks at  $v_1^M$ . Thus, the equilibrium,  $(v_1^M, v_1^M)$ , is Pareto dominating. Let  $(v_1^*, v_2^*) = (v_1^M, v_1^M)$ , it is clear that  $\lambda_1^T = \Lambda(1 - v_1^M)$ , so we have

$$2\alpha\lambda_1^T - \alpha\Lambda + \Lambda \left[ W_1(\mu_1, \lambda_1^T) + \lambda_1^T \frac{\partial W_1(\mu_1, \lambda_1^T)}{\partial \lambda_1} \right] = 0.$$

□

**Proof of Proposition 3.** In particular,  $\mu_2^{T'}(\mu_1)$  is the unique solution to

$$\alpha - (2\alpha - 1) \frac{\lambda_1^T}{\Lambda} - \left[ W_1(\mu_1, \lambda_1^T) + \lambda_1^T \frac{\partial W_1(\mu_1, \lambda_1^T)}{\partial \lambda_1} \right] = 0. \quad (22)$$

We first show that  $\mu_2^T(\mu_1) \leq \mu_2 < \mu_2^{T'}(\mu_1)$  is equivalent to  $\underline{v}_2 < W_2(\mu_2, 0) \leq v_1^M$ . In the proof of Proposition 2, we showed that  $\mu_2^T(\mu_1) \leq \mu_2$  is equivalent to  $W_2(\mu_2, 0) \leq v_1^M$ , and so we just need to verify that  $\mu_2 < \mu_2^{T'}(\mu_1)$  is equivalent to  $\underline{v}_2 < W_2(\mu_2, 0)$ .

By the definition of  $\mu_2^{T'}(\mu_1)$ , it is easily seen that  $\mu_2 < \mu_2^{T'}(\mu_1)$  indicates

$$2(2\alpha - 1)t - \alpha\Lambda + \Lambda \left[ W_1(\mu_1, 2t) + 2t \frac{\partial W_1(\mu_1, 2t)}{\partial \lambda_1} \right] < 0.$$

By the definition of  $f_3(x)$  (see Eq. (??)) and  $\underline{v}_2$  (see Eq. (8)), this further indicates that  $f_3(W_2(\mu_2, 0)) < 0 = f_3(\underline{v}_2)$ . Finally, by the monotonicity of  $f_3(\cdot)$ , it follows that  $W_2(\mu_2, 0) > \underline{v}_2$ , and so  $\underline{v}_2 < W_2(\mu_2, 0) \leq v_1^M$  holds. According to Lemma 1, we have Figure 10.

Figure 10: The Nash equilibrium

As shown in Figure 10, there exist continuum equilibria, from  $(\underline{v}_2, \underline{v}_2)$  to  $(W_2(\mu_2, 0), W_2(\mu_2, 0))$ . Among these equilibria,  $\lambda_2^T = 0$ , and so  $\pi_2 = 0$  holds. As for firm 1, given  $v_2 = v_1$ , it solves

$$\max_{\underline{v}_2 \leq v_1 \leq W_2(\mu_2, 0)} \pi_1(v_1) = \Lambda(1 - v_1)[\alpha v_1 - W_1(\mu_1, \lambda_1(v_1))].$$

By the definition of  $v_1^M$  (see Eq. (??)), it is clear that given  $W_2(\mu_2, 0) \leq v_1^M$ ,  $\pi_1(v_1)$  is increasing in the feasible domain. Thus, the equilibrium,  $(W_2(\mu_2, 0), W_2(\mu_2, 0))$ , is Pareto dominating. Let  $(v_1^*, v_2^*) = (W_2(\mu_2, 0), W_2(\mu_2, 0))$ , it is clear that

$$\lambda_1^T = \Lambda(1 - v_1^*) = \Lambda[1 - W_2(\mu_2, 0)], \quad \lambda_2^T = 0.$$

□

**Proof of Proposition 4.** In particular,  $\mu_1^T(\mu_2)$  is the unique solution to  $W_1(\mu_1^T(\mu_2), 0) = \alpha - \lambda_2^T / \Lambda$ . We first show that  $\mu_1 < \mu_1^T(\mu_2)$  is equivalent to  $1 - \alpha + W_1(\mu_1, 0) > v_2^0(1)$ . By the definition of  $\mu_1^T(\mu_2)$ , it is easily seen that  $\mu_1 < \mu_1^T(\mu_2)$  indicates

$$4s - \Lambda + \Lambda \left[ W_2(\mu_2, 2s) + 2s \frac{\partial W_2(\mu_2, 2s)}{\partial \lambda_2} \right] < 0,$$

where  $s = \Lambda[\alpha - W_1(\mu_1, 0)]/2$ . Let  $f_5(x) := 2(1-x)\Lambda - \Lambda + \Lambda \left[ W_2(\mu_2, \Lambda(1-x)) + \Lambda(1-x) \frac{\partial W_2(\mu_2, \Lambda(1-x))}{\partial \lambda_2} \right]$ . It is clear that  $f_5(x)$  is decreasing in  $x$ , and  $f_5(1 - \alpha + W_1(\mu_1, 0)) = 4s - \Lambda + \Lambda \left[ W_2(\mu_2, 2s) + 2s \frac{\partial W_2(\mu_2, 2s)}{\partial \lambda_2} \right]$ . According to Eq. (??), it is clear that  $f_5(v_2^0(1)) = 0$ . Thus, we have  $f_5(1 - \alpha + W_1(\mu_1, 0)) < 0 = f_5(v_2^0(1))$ . Finally, by the monotonicity of  $f_5(\cdot)$ , it follows that  $1 - \alpha + W_1(\mu_1, 0) > v_2^0(1)$ . According to Lemma 1, we have Figure 11.

Figure 11: The Nash equilibrium

As shown in Figure 11, the equilibrium is  $(v_1^*, v_2^*) = (1, v_2^0(1))$ , and so  $\lambda_1^T = 0$  and  $\lambda_2^T = \Lambda[1 - v_2^0(1)]$ . Let  $v_2^0(1) = 1 - \frac{\lambda_2^T}{\Lambda}$  and substitute it into  $f_5(v_2^0(1)) = 0$ . It follows that

$$2\lambda_2^T - \Lambda + \Lambda \left[ W_2(\mu_2, \lambda_2^T) + \lambda_2^T \frac{\partial W_2(\mu_2, \lambda_2^T)}{\partial \lambda_2} \right] = 0.$$

□

**Proof of Proposition 5.** By the definition of  $\mu_1^T(\mu_2)$  and  $\mu_2^{T'}(\mu_1)$ , when  $\mu_1 \geq \mu_1^T(\mu_2)$  and  $\mu_2 \geq \mu_2^{T'}(\mu_1)$ , we have the following figure.

Figure 12: The Nash equilibrium

As shown in Figure 12, the equilibrium,  $(v_1^*, v_2^*)$ , satisfies

$$\begin{cases} \Lambda(1 - v_1^*) \left[ \alpha - 1 + \Lambda \frac{\partial W_1(\mu_1, \Lambda(1 - v_1^*))}{\partial \lambda_1} \right] - (\alpha - 1)\Lambda v_1^* + \Lambda W_1(\mu_1, \Lambda(1 - v_1^*)) - \Lambda v_2^* = 0, \\ \Lambda(v_1^* - v_2^*) \left[ 1 + \Lambda \frac{\partial W_2(\mu_2, \Lambda(v_1^* - v_2^*))}{\partial \lambda_2} \right] - \Lambda v_2^* + \Lambda W_2(\mu_2, \Lambda(v_1^* - v_2^*)) = 0. \end{cases} \quad (23)$$

On this occasion,  $\lambda_1^T = \Lambda(1 - v_1^*)$  and  $\lambda_2^T = \Lambda(v_1^* - v_2^*)$ . Hence, we have

$$\begin{cases} (2\alpha - 1)\lambda_1^T + \lambda_2^T - \alpha\Lambda + \Lambda \left[ W_1(\mu_1, \lambda_1^T) + \lambda_1^T \frac{\partial W_1(\mu_1, \lambda_1^T)}{\partial \lambda_1} \right] = 0, \\ \lambda_1^T + 2\lambda_2^T - \Lambda + \Lambda \left[ W_2(\mu_2, \lambda_2^T) + \lambda_2^T \frac{\partial W_2(\mu_2, \lambda_2^T)}{\partial \lambda_2} \right] = 0. \end{cases}$$

□

**Proof of Proposition 6.** 1. According to Eq. (??), it is clear that when  $\mu_1 = \underline{\mu}_1$ ,  $\lambda_1^T = 0$ , and thus,  $\mu_2^T(\mu_1) = \underline{\mu}_2$  ( $\mu_2^{T'}(\mu_1) = \underline{\mu}_2$ ). According to Eq. (??), we have  $\mu_2 = \underline{\mu}_2$ ,  $\lambda_2^T = 0$ . Thus,  $\mu_1^T(\mu_2) = \underline{\mu}_1$ .

2. Let

$$f_1(x) = \alpha \left( 1 - 2\frac{x}{\Lambda} \right) - \left[ W_1(\mu_1, x) + x \frac{\partial W_1(\mu_1, x)}{\partial \lambda_1} \right].$$

It is easy to see that  $f_1'(x) < 0$  and  $\frac{\partial f_1(x)}{\partial \mu_1} > 0$ . According to Eq. (??), it is clear that  $\lambda_1^T$  is increasing in  $\mu_1$ . From  $W_2(\mu_2^T(\mu_1), 0) = 1 - \frac{\lambda_1^T}{\Lambda}$ , it is clear that  $\mu_2^T(\mu_1)$  is increasing in  $\mu_1$ .

Let

$$f_2(x) = \alpha - (2\alpha - 1)\frac{x}{\Lambda} - \left[ W_1(\mu_1, x) + x \frac{\partial W_1(\mu_1, x)}{\partial \lambda_1} \right].$$

It is easy to see that  $f_2'(x) < 0$  and  $\frac{\partial f_2(x)}{\partial \mu_1} > 0$ . According to Eq. (??), it is clear that  $\lambda_1^T$  is increasing in  $\mu_1$ . From  $W_2(\mu_2^{T'}(\mu_1), 0) = 1 - \frac{\lambda_1^T}{\Lambda}$ , it is clear that  $\mu_2^{T'}(\mu_1)$  is increasing in  $\mu_1$ .

Let

$$f_3(x) = 1 - 2\frac{x}{\Lambda} - \left[ W_2(\mu_2, x) + x \frac{\partial W_2(\mu_2, x)}{\partial \lambda_2} \right].$$

It is easy to see that  $f_3'(x) < 0$  and  $\frac{\partial f_3(x)}{\partial \mu_2} > 0$ . According to Eq. (??), it is clear that  $\lambda_2^T$  is increasing in  $\mu_2$ . From  $W_1(\mu_1^T(\mu_2), 0) = \alpha - \frac{\lambda_2^T}{\Lambda}$ , it is clear that  $\mu_1^T(\mu_2)$  is increasing in  $\mu_2$ .

3. According to Eq. (??), it is clear that  $\lambda_1^T$  is increasing in  $\alpha$ . From  $W_2(\mu_2^T(\mu_1), 0) = 1 - \frac{\lambda_1^T}{\Lambda}$ , it is clear that  $\mu_2^T(\mu_1)$  is increasing in  $\alpha$ . According to Eq. (??), it is clear that  $\lambda_2^T$  is constant in  $\alpha$ . From  $W_1(\mu_1^T(\mu_2), 0) = \alpha - \frac{\lambda_2^T}{\Lambda}$ , it is clear that  $\mu_1^T(\mu_2)$  is decreasing in  $\alpha$ .



4. We verify this via a contradiction. Assume that there is at least one intersecting point between  $\mu_2 = \mu_2^T(\mu_1)$  and  $\mu_1 = \mu_1^T(\mu_2)$ . Then there exists a pair of  $(\mu_1, \mu_2)$  such that

$$\underline{\mu}_1 < \mu_1 \leq \mu_1^T(\mu_2), \quad \underline{\mu}_2 < \mu_2 \leq \mu_2^T(\mu_1). \quad (24)$$

According to Theorems 2 and 4, this indicates that

$$\lambda_1^T = 0, \quad \lambda_2^T = 0. \quad (25)$$

However, this is true only when

$$\mu_1 < \underline{\mu}_1 \ \& \ \mu_2 < \underline{\mu}_2.$$

Otherwise, the firm can post a small positive price to obtain some customers, and thus, Eq. (14) cannot hold. According to Eq. (13), there is a contradiction. Similarly, we can show that there is no intersecting point between  $\mu_2 = \mu_2^{T'}(\mu_1)$  and  $\mu_1 = \mu_1^T(\mu_2)$ .

To show that there is no intersecting point between  $\mu_2 = \mu_2^{T'}(\mu_1)$  and  $\mu_2 = \mu_2^T(\mu_1)$ , it suffices to show that  $\mu_2^{T'}(\mu_1) > \mu_2^S(\mu_1)$  for any  $\mu_1 > \underline{\mu}_1$ . Note that  $\mu_2^S(\mu_1)$  is determined by  $W_2(\mu_2^S(\mu_1), 0) = 1 - x$ , where  $x$  satisfies  $\alpha(1 - 2\frac{x}{\Lambda}) - \left[W_1(\mu_1, x) + x\frac{\partial W_1(\mu_1, x)}{\partial \lambda_1}\right]$ ;  $\mu_2^{T'}(\mu_1)$  is determined by  $W_2(\mu_2^{T'}(\mu_1), 0) = 1 - y$ , where  $y$  satisfies  $\alpha(1 - 2\frac{y}{\Lambda}) + \frac{y}{\Lambda} - \left[W_1(\mu_1, y) + y\frac{\partial W_1(\mu_1, y)}{\partial \lambda_1}\right]$ . As a result, we need to show that  $y > x$ . Recall that  $f_1(x) = 0 = f_2(y)$ ;  $f_2(\cdot)$  is decreasing;  $f_2(x) - f_1(x) = x/\Lambda > 0$ . It follows that  $f_2(y) = 0 = f_1(x) < f_2(x)$ , and so  $y > x$ .

5. From Eq. (??), it is easy to see that  $\lambda_1^T < \Lambda/2$ , and thus,  $W_2(\mu_2^T(\mu_1), 0) = 1 - \frac{\lambda_1^T}{\Lambda} > \frac{1}{2}$ . From Eq. (??), it is easy to see that  $\lambda_1^T < \frac{\alpha}{2\alpha-1}\Lambda$ , and thus,  $W_2(\mu_2^{T'}(\mu_1), 0) = 1 - \frac{\lambda_1^T}{\Lambda} > \frac{\alpha-1}{2\alpha-1}$ . From Eq. (??), it is easy to see that  $\lambda_1^T < \Lambda/2$ , and so  $W_2(\mu_2^T(\mu_1), 0) = 1 - \frac{\lambda_1^T}{\Lambda} > \frac{1}{2}$ .  $\square$

**Proof of Proposition 7.** The proofs of the first three cases are straightforward; thus, we give the last two cases.

For Case 4, differentiating Eq. (1) w.r.t.  $\mu_1$ , we have

$$\frac{1}{\Lambda} \frac{\partial \lambda_1^T}{\partial \mu_1} = - \left[ \frac{2}{\Lambda} + 2 \frac{\partial W_2(\mu_2, \lambda_2^T)}{\partial \lambda_2} + \lambda_2^T \frac{\partial^2 W_2(\mu_2, \lambda_2^T)}{\partial \lambda_2^2} \right] \frac{\partial \lambda_2^T}{\partial \mu_1} \quad (26)$$

and

$$\frac{1}{\Lambda} \frac{\partial \lambda_2^T}{\partial \mu_1} = - \left[ \frac{2\alpha-1}{\Lambda} + 2 \frac{\partial W_1(\mu_1, \lambda_1^T)}{\partial \lambda_1} + \lambda_1^T \frac{\partial^2 W_1(\mu_1, \lambda_1^T)}{\partial \lambda_1^2} \right] \frac{\partial \lambda_1^T}{\partial \mu_1} - \left[ \frac{\partial W_1(\mu_1, \lambda_1^T)}{\partial \mu_1} + \lambda_1^T \frac{\partial^2 W_1(\mu_1, \lambda_1^T)}{\partial \lambda_1 \partial \mu_1} \right]. \quad (27)$$

This gives  $\frac{\partial \lambda_1^T}{\partial \mu_1} \times \frac{\partial \lambda_2^T}{\partial \mu_1} < 0$ . Furthermore, substituting  $\frac{\partial \lambda_2^T}{\partial \mu_1}$  given in Eq. (??) into Eq. (??), we have

$$\begin{aligned} & \left[ 2 \frac{\partial W_1(\mu_1, \lambda_1^T)}{\partial \lambda_1} + \lambda_1^T \frac{\partial^2 W_1(\mu_1, \lambda_1^T)}{\partial \lambda_1^2} + \frac{2\alpha - 1}{\Lambda} - \frac{1}{\Lambda} \frac{1/\Lambda}{2 \frac{\partial W_2(\mu_2, \lambda_2^T)}{\partial \lambda_2} + \lambda_2^T \frac{\partial^2 W_2(\mu_2, \lambda_2^T)}{\partial \lambda_2^2} + \frac{2}{\Lambda}} \right] \frac{\partial \lambda_1^T}{\partial \mu_1} \\ &= - \left[ \frac{\partial W_1(\mu_1, \lambda_1^T)}{\partial \mu_1} + \lambda_1^T \frac{\partial^2 W_1(\mu_1, \lambda_1^T)}{\partial \lambda_1 \partial \mu_1} \right]. \end{aligned}$$

Note that

$$\frac{2\alpha - 1}{\Lambda} - \frac{1}{\Lambda} \frac{1/\Lambda}{2 \frac{\partial W_2(\mu_2, \lambda_2^T)}{\partial \lambda_2} + \lambda_2^T \frac{\partial^2 W_2(\mu_2, \lambda_2^T)}{\partial \lambda_2^2} + \frac{2}{\Lambda}} > \frac{2\alpha - 1}{\Lambda} - \frac{1}{\Lambda} \frac{1/\Lambda}{\frac{2}{\Lambda}} > 0.$$

It is clear that  $\frac{\partial \lambda_1^T}{\partial \mu_1} > 0$  and  $\frac{\partial \lambda_2^T}{\partial \mu_1} < 0$ . Now,  $\frac{\partial \lambda_1^T}{\partial \mu_1} + \frac{\partial \lambda_2^T}{\partial \mu_1} = \left[ \frac{\frac{1}{\Lambda} + 2 \frac{\partial W_2(\mu_2, \lambda_2^T)}{\partial \lambda_2} + \lambda_2^T \frac{\partial^2 W_2(\mu_2, \lambda_2^T)}{\partial \lambda_2^2}}{\frac{2}{\Lambda} + 2 \frac{\partial W_2(\mu_2, \lambda_2^T)}{\partial \lambda_2} + \lambda_2^T \frac{\partial^2 W_2(\mu_2, \lambda_2^T)}{\partial \lambda_2^2}} \right] \frac{\partial \lambda_1^T}{\partial \mu_1} > 0$ .

Similarly, we can show that  $\frac{\partial \lambda_1^T}{\partial \mu_2} < 0$ ,  $\frac{\partial \lambda_2^T}{\partial \mu_2} > 0$  and  $\frac{\partial \lambda_1^T}{\partial \mu_2} + \frac{\partial \lambda_2^T}{\partial \mu_2} > 0$ .

For Case 5, differentiating Eq. (1) w.r.t.  $\alpha$ , we have

$$-\frac{1}{\Lambda} \frac{\partial \lambda_1^T}{\partial \alpha} = \left[ 2 \frac{\partial W_2(\mu_2, \lambda_2^T)}{\partial \lambda_2} + \lambda_2^T \frac{\partial^2 W_2(\mu_2, \lambda_2^T)}{\partial \lambda_2^2} + \frac{2}{\Lambda} \right] \frac{\partial \lambda_2^T}{\partial \alpha}$$

and

$$1 - 2 \frac{\lambda_1^T}{\Lambda} = \left[ 2 \frac{\partial W_1(\mu_1, \lambda_1^T)}{\partial \lambda_1} + \lambda_1^T \frac{\partial^2 W_1(\mu_1, \lambda_1^T)}{\partial \lambda_1^2} + \frac{2\alpha - 1}{\Lambda} \right] \frac{\partial \lambda_1^T}{\partial \alpha} + \frac{1}{\Lambda} \frac{\partial \lambda_2^T}{\partial \alpha}.$$

This gives  $\frac{\partial \lambda_1^T}{\partial \alpha} \times \frac{\partial \lambda_2^T}{\partial \alpha} < 0$ ,  $\frac{\partial(\lambda_1^T + \lambda_2^T)}{\partial \alpha} = - \left[ 2\Lambda \frac{\partial W_2(\mu_2, \lambda_2^T)}{\partial \lambda_2} + \Lambda \lambda_2^T \frac{\partial^2 W_2(\mu_2, \lambda_2^T)}{\partial \lambda_2^2} + 1 \right] \frac{\partial \lambda_2^T}{\partial \alpha}$  and

$$\left[ 2 \frac{\partial W_1(\mu_1, \lambda_1^T)}{\partial \lambda_1} + \lambda_1^T \frac{\partial^2 W_1(\mu_1, \lambda_1^T)}{\partial \lambda_1^2} + \frac{2\alpha - 1}{\Lambda} - \frac{1}{\Lambda} \frac{1/\Lambda}{2 \frac{\partial W_2(\mu_2, \lambda_2^T)}{\partial \lambda_2} + \lambda_2^T \frac{\partial^2 W_2(\mu_2, \lambda_2^T)}{\partial \lambda_2^2} + \frac{2}{\Lambda}} \right] \frac{\partial \lambda_1^T}{\partial \alpha} = 1 - 2 \frac{\lambda_1^T}{\Lambda}.$$

Thus, if  $1 - 2 \frac{\lambda_1^T}{\Lambda} \geq 0$ , then  $\frac{\partial \lambda_1^T}{\partial \alpha} \geq 0$ ,  $\frac{\partial \lambda_2^T}{\partial \alpha} \leq 0$ , and  $\frac{\partial(\lambda_1^T + \lambda_2^T)}{\partial \alpha} \geq 0$ ; if  $1 - 2 \frac{\lambda_1^T}{\Lambda} < 0$ , then  $\frac{\partial \lambda_1^T}{\partial \alpha} < 0$ ,  $\frac{\partial \lambda_2^T}{\partial \alpha} > 0$  and  $\frac{\partial(\lambda_1^T + \lambda_2^T)}{\partial \alpha} < 0$ . According to Proposition 7, it is clear that as  $\mu_2$  increases,  $\lambda_1^T$  first remains unchanged, then increases, and then decreases. In particular,  $\lambda_1^T$  peaks at  $\mu_2 = \mu_2^{T'}(\mu_1)$  with value  $\Lambda[1 - W_2(\mu_2^{T'}(\mu_1), 0)]$ . Let  $1 - 2 \frac{\Lambda[1 - W_2(\mu_2^{T'}(\mu_1), 0)]}{\Lambda} > 0$ . We have  $W_2(\mu_2^{T'}(\mu_1), 0) > 1/2$ . Recall that  $\mu_2^{T'}(\mu_1)$  is increasing in  $\mu_1$ . Thus, when  $\mu_1$  is small,  $W_2(\mu_2^{T'}(\mu_1), 0) > 1/2$  holds, and so  $\frac{\partial \lambda_1^T}{\partial \alpha} \geq 0$ ,  $\frac{\partial \lambda_2^T}{\partial \alpha} \leq 0$  and  $\frac{\partial(\lambda_1^T + \lambda_2^T)}{\partial \alpha} \geq 0$ . In contrast, when  $\mu_1$  is large,  $W_2(\mu_2^{T'}(\mu_1), 0) \leq 1/2$  holds. Note also that  $\lambda_1^T$  is decreasing in  $\mu_2$  for  $\mu_2 \geq \mu_2^{T'}(\mu_1)$ . It follows that (1) when  $\mu_2$  is small,  $1 - 2 \frac{\lambda_1^T}{\Lambda} \leq 0$ , and so  $\frac{\partial \lambda_1^T}{\partial \alpha} \leq 0$ ,  $\frac{\partial \lambda_2^T}{\partial \alpha} \geq 0$  and  $\frac{\partial(\lambda_1^T + \lambda_2^T)}{\partial \alpha} \leq 0$ ; (2) when  $\mu_2$  is large,  $1 - 2 \frac{\lambda_1^T}{\Lambda} > 0$ , and so  $\frac{\partial \lambda_1^T}{\partial \alpha} > 0$ ,  $\frac{\partial \lambda_2^T}{\partial \alpha} < 0$  and  $\frac{\partial(\lambda_1^T + \lambda_2^T)}{\partial \alpha} > 0$ .  $\square$

**Proof of Lemma 2.** Differentiating (2) with respect to  $p_1$ , we have

$$\begin{aligned} 1 &= \left[ -\alpha \frac{1}{\Lambda} - \frac{\partial W_1(\mu_1, \lambda_1)}{\partial \lambda_1} \right] \frac{\partial \lambda_1}{\partial p_1} - \frac{1}{\Lambda} \frac{\partial \lambda_2}{\partial p_1}, \\ 0 &= -\frac{1}{\Lambda} \frac{\partial \lambda_1}{\partial p_1} + \left[ -\frac{1}{\Lambda} - \frac{\partial W_2(\mu_2, \lambda_2)}{\partial \lambda_2} \right] \frac{\partial \lambda_2}{\partial p_1}. \end{aligned}$$

From the second equation, we have  $\text{sign}[\frac{\partial \lambda_1}{\partial p_1}] = -\text{sign}[\frac{\partial \lambda_2}{\partial p_1}]$ . Combining these equations and eliminating  $\frac{\partial \lambda_2}{\partial p_1}$ , we have

$$1 = \left[ -(\alpha - 1) \frac{1}{\Lambda} - \frac{\partial W_1(\mu_1, \lambda_1)}{\partial \lambda_1} - \frac{1}{\Lambda} + \frac{\left(\frac{-1}{\Lambda}\right)^2}{\frac{1}{\Lambda} + \frac{\partial W_2(\mu_2, \lambda_2)}{\partial \lambda_2}} \right] \frac{\partial \lambda_1}{\partial p_1}$$

This gives  $\frac{\partial \lambda_1}{\partial p_1} < 0$  and  $\frac{\partial \lambda_2}{\partial p_1} > 0$ . Moreover, we have

$$\frac{\partial \lambda_1}{\partial p_1} + \frac{\partial \lambda_2}{\partial p_1} = \left[ \frac{\frac{\partial W_2(\mu_2, \lambda_2)}{\partial \lambda_2}}{\frac{1}{\Lambda} + \frac{\partial W_2(\mu_2, \lambda_2)}{\partial \lambda_2}} \right] \frac{\partial \lambda_1}{\partial p_1} < 0.$$

In the same way, it can be shown that  $\frac{\partial \lambda_1}{\partial p_2} > 0$ ,  $\frac{\partial \lambda_2}{\partial p_2} < 0$  and  $\frac{\partial \lambda_1}{\partial p_2} + \frac{\partial \lambda_2}{\partial p_2} < 0$ .  $\square$

**Proof of Lemma 3.** According to

$$\pi_1(\lambda_1) = \lambda_1 \left[ \alpha - \alpha \frac{\lambda_1}{\Lambda} - \frac{\lambda_2}{\Lambda} - W_1(\mu_1, \lambda_1) \right],$$

we have

$$\begin{aligned} \pi_1'(\lambda_1) &= \alpha - 2\alpha \frac{\lambda_1}{\Lambda} - \frac{\lambda_2}{\Lambda} - W_1(\mu_1, \lambda_1) - \lambda_1 \frac{\partial W_1(\mu_1, \lambda_1)}{\partial \lambda_1}, \\ \pi_1''(\lambda_1) &= -2\frac{\alpha}{\Lambda} - 2\frac{\partial W_1(\mu_1, \lambda_1)}{\partial \lambda_1} - \lambda_1 \frac{\partial^2 W_1(\mu_1, \lambda_1)}{\partial \lambda_1^2} < 0. \end{aligned}$$

This proves the concavity of  $\pi_1(\lambda_1)$  in  $\lambda_1$ . As for  $\pi_2(\lambda_2)$ , we have

$$\begin{aligned} \pi_2'(\lambda_2) &= 1 - 2\frac{\lambda_2}{\Lambda} - \frac{\lambda_1}{\Lambda} - W_2(\mu_2, \lambda_2) - \lambda_2 \frac{\partial W_2(\mu_2, \lambda_2)}{\partial \lambda_2}, \\ \pi_2''(\lambda_2) &= -\frac{2}{\Lambda} - 2\frac{\partial W_2(\mu_2, \lambda_2)}{\partial \lambda_2} - \lambda_2 \frac{\partial^2 W_2(\mu_2, \lambda_2)}{\partial \lambda_2^2} < 0. \end{aligned}$$

This proves the concavity of  $\pi_2(\lambda_2)$  in  $\lambda_2$ .  $\square$

**Proof of Lemma 4.** Note that each firm's best response is characterized by the FOC. Firm 1's best response, say  $\lambda_1^*(\lambda_2)$ , is given by

$$\alpha - 2\alpha \frac{\lambda_1^*(\lambda_2)}{\Lambda} - \frac{\lambda_2}{\Lambda} - W_1(\mu_1, \lambda_1^*(\lambda_2)) - \lambda_1^*(\lambda_2) \frac{\partial W_1(\mu_1, \lambda_1^*(\lambda_2))}{\partial \lambda_1} = 0,$$

and firm 2's best response, say  $\lambda_2^*(\lambda_1)$ , is given by

$$1 - 2\frac{\lambda_2^*(\lambda_1)}{\Lambda} - \frac{\lambda_1}{\Lambda} - W_2(\mu_2, \lambda_2^*(\lambda_1)) - \lambda_2^*(\lambda_1) \frac{\partial W_2(\mu_2, \lambda_2^*(\lambda_1))}{\partial \lambda_2} = 0.$$

This gives

$$\frac{\partial \lambda_1^*(\lambda_2)}{\partial \lambda_2} = -\frac{1}{2\alpha + 2\Lambda \frac{\partial W_1(\mu_1, \lambda_1^*(\lambda_2))}{\partial \lambda_1} + \lambda_1^*(\lambda_2) \frac{\partial^2 W_1(\mu_1, \lambda_1^*(\lambda_2))}{\partial \lambda_1^2}} < 0, \quad \left| \frac{\partial \lambda_1^*(\lambda_2)}{\partial \lambda_2} \right| < 1,$$

and

$$\frac{\partial \lambda_2^*(\lambda_1)}{\partial \lambda_1} = -\frac{1}{2 + 2\Lambda \frac{\partial W_2(\mu_2, \lambda_2^*(\lambda_1))}{\partial \lambda_2} + \lambda_2^*(\lambda_1) \frac{\partial^2 W_2(\mu_2, \lambda_2^*(\lambda_1))}{\partial \lambda_2^2}} < 0, \quad \left| \frac{\partial \lambda_2^*(\lambda_1)}{\partial \lambda_1} \right| < 1.$$

□

### Proof of Proposition 8.

- For Region (I), firm 1's effective arrival rate  $\lambda_1^S$  is given by

$$\alpha \left( 1 - 2\frac{\lambda_1^S}{\Lambda} \right) - \left[ W_1(\mu_1, \lambda_1^S) + \lambda_1^S \frac{\partial W_1(\mu_1, \lambda_1^S)}{\partial \lambda_1} \right] = 0. \quad (28)$$

- For Region (II), firm 2's effective arrival rate  $\lambda_2^S$  is given by

$$\left( 1 - 2\frac{\lambda_2^S}{\Lambda} \right) - \left[ W_2(\mu_2, \lambda_2^S) + \lambda_2^S \frac{\partial W_2(\mu_2, \lambda_2^S)}{\partial \lambda_2} \right] = 0. \quad (29)$$

- For Region (III),  $\lambda_1^S$  and  $\lambda_2^S$  are given by

$$\begin{cases} \frac{\lambda_2^S}{\Lambda} = \alpha \left( 1 - 2\frac{\lambda_1^S}{\Lambda} \right) - \left[ W_1(\mu_1, \lambda_1^S) + \lambda_1^S \frac{\partial W_1(\mu_1, \lambda_1^S)}{\partial \lambda_1} \right], \\ \frac{\lambda_1^S}{\Lambda} = \left( 1 - 2\frac{\lambda_2^S}{\Lambda} \right) - \left[ W_2(\mu_2, \lambda_2^S) + \lambda_2^S \frac{\partial W_2(\mu_2, \lambda_2^S)}{\partial \lambda_2} \right]. \end{cases} \quad (30)$$

- $\mu_2^S(\mu_1)$  and  $\mu_1^S(\mu_2)$  are the solutions to  $W_2(\mu_2^S(\mu_1), 0) = 1 - \lambda_1^S/\Lambda$  and  $W_1(\mu_1^S(\mu_2), 0) = \alpha - \lambda_2^S/\Lambda$ , respectively, where  $\lambda_1^S$  is determined by (15) and  $\lambda_2^S$  is determined by (16).

According to Lemmas 3 and 4, the equilibrium of the effective arrival rates  $(\lambda_1^S, \lambda_2^S)$  is derived from

$\pi_1'(\lambda_1^S) = 0$  and  $\pi_2'(\lambda_2^S) = 0$ ; i.e.,

$$\frac{\lambda_2^S}{\Lambda} = \alpha \left( 1 - 2\frac{\lambda_1^S}{\Lambda} \right) - \left[ W_1(\mu_1, \lambda_1^S) + \lambda_1^S \frac{\partial W_1(\mu_1, \lambda_1^S)}{\partial \lambda_1} \right], \quad (31)$$

$$\frac{\lambda_1^S}{\Lambda} = \left( 1 - 2\frac{\lambda_2^S}{\Lambda} \right) - \left[ W_2(\mu_2, \lambda_2^S) + \lambda_2^S \frac{\partial W_2(\mu_2, \lambda_2^S)}{\partial \lambda_2} \right]. \quad (32)$$

Next, we derive the condition for  $\lambda_i^S \geq 0$  for  $i = 1, 2$ . We begin by showing that  $\frac{\partial \lambda_1}{\partial \mu_1} > 0$  and  $\frac{\partial \lambda_2}{\partial \mu_2} > 0$ . Differentiating Eq. (??) w.r.t.  $\mu_1$ , we have

$$\frac{1}{\Lambda} \frac{\partial \lambda_1}{\partial \mu_1} = - \left[ \frac{2}{\Lambda} + 2 \frac{\partial W_2(\mu_2, \lambda_2^S)}{\partial \lambda_2} + \lambda_2^S \frac{\partial^2 W_2(\mu_2, \lambda_2^S)}{\partial \lambda_2^2} \right] \frac{\partial \lambda_2}{\partial \mu_1}. \quad (33)$$

This gives  $\frac{\partial \lambda_1}{\partial \mu_1} \times \frac{\partial \lambda_2}{\partial \mu_1} < 0$ . Furthermore, differentiating Eq. (??) w.r.t.  $\mu_1$  and substituting  $\frac{\partial \lambda_2}{\partial \mu_1}$  given in Eq. (??), we have

$$\begin{aligned} & \left[ 2 \frac{\partial W_1(\mu_1, \lambda_1^S)}{\partial \lambda_1} + \lambda_1^S \frac{\partial^2 W_1(\mu_1, \lambda_1^S)}{\partial \lambda_1^2} + \frac{2\alpha}{\Lambda} - \frac{1}{\Lambda} \frac{1/\Lambda}{2 \frac{\partial W_2(\mu_2, \lambda_2^S)}{\partial \lambda_2} + \lambda_2^S \frac{\partial^2 W_2(\mu_2, \lambda_2^S)}{\partial \lambda_2^2} + \frac{2}{\Lambda}} \right] \frac{\partial \lambda_1}{\partial \mu_1} \\ &= - \left[ \frac{\partial W_1(\mu_1, \lambda_1^S)}{\partial \mu_1} + \lambda_1^S \frac{\partial^2 W_1(\mu_1, \lambda_1^S)}{\partial \lambda_1 \partial \mu_1} \right]. \end{aligned}$$

Note that

$$2 \frac{\partial W_1(\mu_1, \lambda_1^S)}{\partial \lambda_1} + \lambda_1^S \frac{\partial^2 W_1(\mu_1, \lambda_1^S)}{\partial \lambda_1^2} + \frac{2\alpha}{\Lambda} - \frac{1}{\Lambda} \frac{1/\Lambda}{2 \frac{\partial W_2(\mu_2, \lambda_2^S)}{\partial \lambda_2} + \lambda_2^S \frac{\partial^2 W_2(\mu_2, \lambda_2^S)}{\partial \lambda_2^2} + \frac{2}{\Lambda}} > \frac{2\alpha}{\Lambda} - \frac{1}{\Lambda} \frac{1/\Lambda}{\frac{2}{\Lambda}} > 0.$$

It is clear that  $\frac{\partial \lambda_1}{\partial \mu_1} > 0$  and  $\frac{\partial \lambda_2}{\partial \mu_1} < 0$ . Similarly, we can show that  $\frac{\partial \lambda_1}{\partial \mu_2} < 0$  and  $\frac{\partial \lambda_2}{\partial \mu_2} > 0$ .

Let  $\lambda_2^S = 0$ . According to Eqs. (??) and (??), we have

$$1 - \frac{\lambda_1^S}{\Lambda} = W_2(\mu_2, 0), \quad (34)$$

$$\alpha \left( 1 - 2 \frac{\lambda_1^S}{\Lambda} \right) - \left[ W_1(\mu_1, \lambda_1^S) + \lambda_1^S \frac{\partial W_1(\mu_1, \lambda_1^S)}{\partial \lambda_1} \right] = 0. \quad (35)$$

Thus,  $\lambda_2^S \geq 0$  if and only if  $\mu_2 \geq \mu_2^S(\mu_1)$ , where  $\mu_2^S(\mu_1)$  satisfies  $W_2(\mu_2^S(\mu_1), 0) = 1 - \frac{\lambda_1^S}{\Lambda}$  with  $\lambda_1^S$  determined by Eq. (19). Let  $\lambda_1^S = 0$ . We have

$$\alpha - \frac{\lambda_2^S}{\Lambda} = W_1(\mu_1, 0), \quad (36)$$

$$\left( 1 - 2 \frac{\lambda_2^S}{\Lambda} \right) - \left[ W_2(\mu_2, \lambda_2^S) + \lambda_2^S \frac{\partial W_2(\mu_2, \lambda_2^S)}{\partial \lambda_2} \right] = 0. \quad (37)$$

Then,  $\lambda_1^S \geq 0$  if and only if  $\mu_1 \geq \mu_1^S(\mu_2)$ , where  $\mu_1^S(\mu_2)$  satisfies  $W_1(\mu_1^S(\mu_2), 0) = \alpha - \frac{\lambda_2^S}{\Lambda}$  with  $\lambda_2^S$  determined by Eq. (21). Thus,  $\lambda_i^D \geq 0$  if and only if both  $\mu_2 \geq \mu_2^S(\mu_1)$  and  $\mu_1 \geq \mu_1^S(\mu_2)$  hold. Moreover, if one of them does not hold, the market structure becomes a monopoly. In particular, it is easy to show that if  $\mu_2 < \mu_2^S(\mu_1)$ ,  $\lambda_1^S$  is exactly characterized by Eq. (19); if  $\mu_1 < \mu_1^S(\mu_2)$ ,  $\lambda_2^S$  is exactly characterized by Eq. (21).  $\square$

**Proof of Proposition 9.** We omit this proof because it is similar to but less complicated than that of Proposition 6.  $\square$

**Proof of Proposition 10.** We omit this proof because it is similar to but less complicated than that of Proposition 7.  $\square$

**Proof of Proposition 11.** It follows immediately from Propositions 2 and 4 and Parts (1) and (2) of Proposition 8.  $\square$

**Proof of Proposition 12.** The proof is divided into two cases: (1)  $\mu_2^T(\mu_1) < \mu_2 < \mu_2^{T'}(\mu_1)$ ; (2)  $\mu_1 > \mu_1^T(\mu_2)$  and  $\mu_2 \geq \mu_2^{T'}(\mu_1)$ . (1) When  $\mu_2^T(\mu_1) < \mu_2 < \mu_2^{T'}(\mu_1)$ , we have  $\lambda_2^T = 0 < \lambda_2^S$ . Note that  $\lambda_1^T = \lambda_1^S$  when  $\mu_2 = \mu_2^T(\mu_1)$ . Note also that when  $\mu_2^T(\mu_1) < \mu_2 < \mu_2^{T'}(\mu_1)$ ,  $\partial\lambda_1^T/\partial\mu_2 > 0$  and  $\partial\lambda_1^S/\partial\mu_2 < 0$ . It is immediate that  $\lambda_1^T > \lambda_1^S$ . (2) When  $\mu_1 > \mu_1^T(\mu_2)$  and  $\mu_2 \geq \mu_2^{T'}(\mu_1)$ , the equilibrium market structure is a duopoly in the value-based and size-based competitions and  $\lambda_i^j > 0$ ,  $i = 1, 2$  and  $j = T, S$ . We prove by contradiction that  $\lambda_1^T > \lambda_1^S$ . Suppose otherwise that  $\lambda_1^T \leq \lambda_1^S$ . In the previous case, we have shown that  $\lambda_1^T > \lambda_1^S$  when  $\mu_2 = \mu_2^{T'}(\mu_1)$ . By the continuity of  $\lambda_1^T$  and  $\lambda_1^S$ . There exists at least one threshold with respect to  $\mu_2$  such that  $\lambda_1^T = \lambda_1^S$ . Then from the second line of Eqs. (1) and (17), we have  $\lambda_2^T = \lambda_2^S$ , which, according to the first line of Eqs. (1) and (17), gives us  $\lambda_1^T = \lambda_1^S = 0$ , thus contradicting with  $\lambda_1^T > 0$  and  $\lambda_1^S > 0$ . Therefore, we have  $\lambda_1^T > \lambda_1^S$ , and from the second line of Eqs. (1) and (17), we have  $\lambda_2^T < \lambda_2^S$ .  $\square$

**Proof of Proposition 13.** Note from Proposition 12 that  $\lambda_2^S > \lambda_2^T$ , and thus, we can immediately conclude that  $p_2^T < p_2^S$  since  $p_2^j = \frac{\lambda_2^j}{\Lambda} + \lambda_2^j \frac{\partial W_2(\mu_2, \lambda_2^j)}{\partial \lambda_2^j}$  is increasing in  $\lambda_2^j$  for  $j = S, T$ . Next, we prove  $p_1^T < p_1^S$  by contradiction. Note that the equilibrium effective arrival rates and prices in a duopoly satisfy (2). Suppose now that  $p_1^T \geq p_1^S$ . Recall that  $p_2^T < p_2^S$ . From Lemma 2, we have  $\lambda_1$  increases in  $p_2$  and decreases in  $p_1$ . Thus,  $p_2^T < p_2^S$  and  $p_1^T \geq p_1^S$  result in  $\lambda_1^T < \lambda_1^S$ , which contradicts  $\lambda_1^T > \lambda_1^S$ . Hence,  $p_1^T < p_1^S$  holds. Now, we have  $p_1^T < p_1^S$  and  $p_2^T < p_2^S$ , from Lemma 2, it is clear that  $\lambda_1^T + \lambda_2^T > \lambda_1^S + \lambda_2^S$ .  $\square$
